# Supplementary material for: Improved microarray gene expression profiling of virus-infected cells after removal of viral RNA
Source: PubMed Central journal article supplement (PMC2397413; doi:10.1186/1471-2164-9-221), 2008-05-14
Supplement: 1471-2164-9-221-S1.pdf [file 1471-2164-9-221-S1.pdf]

**Supplemental Table S1.**

| <b>False-positive hits:</b> |         | Fold induction      |                    |                   |                |            |
|-----------------------------|---------|---------------------|--------------------|-------------------|----------------|------------|
|                             |         | Standard            | vRNA depletion     | Standard          | vRNA depletion | RT-PCR     |
| Gene ID                     | Name    | 70-mer arrays       |                    | Affymetrix arrays |                | n.d*/n.t** |
| NM_016808                   | Usp2    | <b><u>310.3</u></b> | <b><u>70.1</u></b> | <2                | <2             | <b>1.2</b> |
| NM_001001809                | Olf218  | <b><u>210.0</u></b> | <b><u>12.1</u></b> | <2                | <2             | n.d.       |
| NM_010915                   | Klk1b4  | <b><u>209.2</u></b> | <b><u>22.2</u></b> | <2                | <2             | n.d.       |
| NM_012013                   | Figla   | <b><u>162.7</u></b> | <b><u>23.1</u></b> | <2                | <2             | n.d.       |
| NM_130886                   | Card14  | <b><u>9.8</u></b>   | <2                 | <2                | <2             | <b>1.6</b> |
| NM_029562                   | Cyp2d26 | <b><u>9.9</u></b>   | <2                 | <2                | <2             | n.d.       |
| NM_175305                   | Lrrc19  | <b><u>9.9</u></b>   | <2                 | <2                | <2             | n.d.       |
| NM_174854                   | Disc1   | <b><u>9.7</u></b>   | <2                 | <2                | <2             | n.d.       |
| NM_007954                   | Es1     | <b><u>9.5</u></b>   | <2                 | <2                | <2             | n.d.       |
| NM_010333                   | Edg5    | <b><u>4.8</u></b>   | <2                 | <b><u>5.5</u></b> | <2             | <b>1.0</b> |
| NM_178403                   | Pus7    | <2                  | <2                 | <b><u>4.4</u></b> | <2             | <b>1.2</b> |
| NM_181400                   | Wdr47   | <2                  | <2                 | <b><u>2.3</u></b> | <2             | <b>1.5</b> |
| NM_133753                   | Errfi1  | <2                  | <2                 | <b><u>2.1</u></b> | <2             | <b>1.5</b> |

\*n.d. = not detectable, \*\*n.t. = not tested

**Supplemental Table S1.** continued

| <b>Additional hits:</b> |          | Fold induction |                |                   |                |             |
|-------------------------|----------|----------------|----------------|-------------------|----------------|-------------|
|                         |          | Standard       | vRNA depletion | Standard          | vRNA depletion | RT-PCR      |
| Gene ID                 | Name     | 70-mer arrays  |                | Affymetrix arrays |                | n.d*/n.t**  |
| NM_010234               | Fos      | <2             | <u>2.1</u>     | <u>14.5</u>       | <u>16.5</u>    | <u>27.5</u> |
| NM_008390               | Irf1     | <2             | <u>2.4</u>     | <u>2.2</u>        | <u>2.4</u>     | <u>2.8</u>  |
| NM_008562               | Mcl1     | <2             | <u>2.3</u>     | <u>2.1</u>        | <u>2.0</u>     | <u>2.1</u>  |
| NM_013642               | Dusp1    | <2             | <u>2.4</u>     | <u>2.6</u>        | <u>3.8</u>     | n.t.        |
| NM_009344               | Phlda1   | <2             | <u>2.5</u>     | <u>2.0</u>        | <u>2.6</u>     | n.t.        |
| NM_178392               | Snapc1   | <2             | <u>2.1</u>     | <u>2.0</u>        | <u>2.4</u>     | n.t.        |
| NM_010495               | Id1      | <2             | <u>2.1</u>     | <u>2.5</u>        | <u>2.6</u>     | n.t.        |
| NM_008235               | Hes1     | <2             | <u>2.0</u>     | <u>2.7</u>        | <u>2.7</u>     | n.t.        |
| NM_029092               | Rg9mtd1  | <2             | <u>2.0</u>     | <u>2.0</u>        | <u>2.1</u>     | n.t.        |
| NM_010496               | Id2      | <2             | <u>2.0</u>     | <2                | <u>2.7</u>     | <u>2.8</u>  |
| NM_172154               | Lcor     | <2             | <u>2.0</u>     | <2                | <u>2.7</u>     | <u>4.2</u>  |
| NM_011498               | Bhlhb2   | <2             | <u>2.1</u>     | <2                | <u>2.5</u>     | n.t.        |
| NM_010591               | Jun      | <2             | <u>2.0</u>     | <2                | <u>2.3</u>     | n.t.        |
| NM_008871               | Serpine1 | <2             | <u>2.3</u>     | <2                | <2             | <u>2.2</u>  |
| NM_010804               | Mllt10   | <2             | <2             | <2                | <u>2.6</u>     | <u>2.1</u>  |

\*n.d. = not detectable, \*\*n.t. = not tested

**Supplemental Table S1.** continued

| <b>Hits by both platforms<br/>and both methods:</b> |          | Fold induction |                   |                   |                   |             |
|-----------------------------------------------------|----------|----------------|-------------------|-------------------|-------------------|-------------|
|                                                     |          | Standard       | vRNA<br>depletion | Standard          | vRNA<br>depletion | RT-PCR      |
| Gene ID                                             | Name     | 70-mer arrays  |                   | Affymetrix arrays |                   | n.d*/n.t**  |
| NM_010907                                           | Nfkbia   | <u>2.6</u>     | <u>2.7</u>        | <u>2.9</u>        | <u>3.5</u>        | <u>3.4</u>  |
| NM_022331                                           | Herpud1  | <u>2.4</u>     | <u>2.6</u>        | <u>4.3</u>        | <u>5.7</u>        | <u>5.1</u>  |
| NM_008176                                           | Cxcl1    | <u>5.9</u>     | <u>7.3</u>        | <u>6.0</u>        | <u>6.1</u>        | <u>10.8</u> |
| NM_009140                                           | Cxcl2    | <u>3.8</u>     | <u>6.3</u>        | <u>6.3</u>        | <u>7.7</u>        | <u>7.2</u>  |
| NM_013692                                           | Klf10    | <u>4.7</u>     | <u>6.1</u>        | <u>5.4</u>        | <u>5.8</u>        | n.t.        |
| NM_013602                                           | Mt1      | <u>2.2</u>     | <u>3.1</u>        | <u>3.5</u>        | <u>4.3</u>        | n.t.        |
| NM_011803                                           | Klf6     | <u>2.6</u>     | <u>2.7</u>        | <u>2.6</u>        | <u>2.9</u>        | n.t.        |
| NM_153159                                           | Zc3h12a  | <u>2.1</u>     | <u>3.4</u>        | <u>2.4</u>        | <u>2.8</u>        | n.t.        |
| NM_015786                                           | Hist1h1c | <u>2.6</u>     | <u>4.4</u>        | <u>5.2</u>        | <u>7.5</u>        | n.t.        |
| NM_133662                                           | Ier3     | <u>3.2</u>     | <u>3.4</u>        | <u>4.7</u>        | <u>4.9</u>        | n.t.        |
| NM_008321                                           | Id3      | <u>2.6</u>     | <u>2.8</u>        | <u>2.9</u>        | <u>3.2</u>        | n.t.        |

\*n.d. = not detectable, \*\*n.t. = not tested
