# Supplementary material for: Improved microarray gene expression profiling of virus-infected cells after removal of viral RNA
Source: PubMed Central journal article supplement (PMC2397413; doi:10.1186/1471-2164-9-221), 2008-05-14
Supplement: 1471-2164-9-221-S2.pdf [file 1471-2164-9-221-S2.pdf]

**Supplemental Table S2.**

| (Chip ID)                            | SF   | RawQ | Bg Avg | Noise Avg | #P                   | %P                   | Signal (All) | Gapdh Ratio | $\beta$ -Actin Ratio |
|--------------------------------------|------|------|--------|-----------|----------------------|----------------------|--------------|-------------|----------------------|
| <b><u>MHV #A</u></b>                 | 7,56 | 1,10 | 34,31  | 1,31      | <b><u>19191</u></b>  | <b><u>42,55</u></b>  | 791,98       | 0,62        | 1,82                 |
| <b><u>MHV #B</u></b>                 | 7,10 | 1,10 | 33,45  | 1,30      | <b><u>19772</u></b>  | <b><u>43,84</u></b>  | 790,72       | 0,59        | 1,65                 |
| <b><u>MHV #C</u></b>                 | 9,97 | 0,88 | 28,83  | 1,04      | <b><u>18512</u></b>  | <b><u>41,05</u></b>  | 800,34       | 0,65        | 1,59                 |
| mock #A                              | 5,25 | 0,92 | 29,65  | 1,14      | 20432                | 45,30                | 801,53       | 0,67        | 1,11                 |
| mock #B                              | 3,50 | 1,10 | 33,61  | 1,47      | 21362                | 47,36                | 779,64       | 0,68        | 1,08                 |
| mock #C                              | 3,66 | 1,11 | 34,76  | 1,44      | 21311                | 47,25                | 774,95       | 0,69        | 1,14                 |
| <b><u>MHV (vRNA depleted) #A</u></b> | 4,68 | 1,00 | 32,44  | 1,20      | <b><u>21265*</u></b> | <b><u>47,15*</u></b> | 734,54       | 0,85        | 1,81                 |
| <b><u>MHV (vRNA depleted) #B</u></b> | 5,28 | 0,96 | 30,42  | 1,21      | <b><u>20888*</u></b> | <b><u>46,31*</u></b> | 750,52       | 0,72        | 1,59                 |
| <b><u>MHV (vRNA depleted) #C</u></b> | 6,44 | 1,01 | 32,21  | 1,21      | <b><u>20168*</u></b> | <b><u>44,72*</u></b> | 757,22       | 0,85        | 1,92                 |
| mock (vRNA depleted) #A              | 4,77 | 0,96 | 31,21  | 1,20      | 20722                | 45,95                | 797,83       | 0,79        | 1,26                 |
| mock (vRNA depleted) #B              | 4,99 | 1,05 | 34,41  | 1,26      | 20611                | 45,70                | 789,74       | 0,77        | 1,29                 |
| mock (vRNA depleted) #C              | 3,73 | 1,06 | 33,42  | 1,36      | 21239                | 47,09                | 779,72       | 0,73        | 1,19                 |

\*Note that the number/percentage of detected probe sets (#P and %P) is increased in the arrays hybridized with cRNA from MHV-infected cells after vRNA depletion. The other QC parameters indicate that the generated data are of high quality.
